# Supplementary material for: Revision of the Assassin Bug Genus Sigicoris stat. nov. Based on Morphological Study and Molecular Phylogeny (Heteroptera: Reduviidae: Peiratinae)
Source: MDPI journal article supplement (doi:10.3390/insects13100951), 2022-10-19
Supplement: s1 [file s1]

**Table S2. Information of sequences used in phylogenetic study.**

| Subfamily     | Species                               | Gene         | GenBank accession number |
|---------------|---------------------------------------|--------------|--------------------------|
| Harpactorinae | <i>Sphedanolestes impressicollis</i>  | COI          | KC887536                 |
|               |                                       | 16S          | KC887536                 |
|               |                                       | Partial 18S  | KC413925                 |
| Triatominae   | <i>Triatoma rubrofasciata</i>         | COI          | MH934953                 |
|               |                                       | 16S          | MH934953                 |
|               |                                       | Partial 18S  | AJ421960                 |
| Peiratinae    | <i>Androclis borneensis</i>           | COI*         | ON351532                 |
|               |                                       | 16S*         | ON355293                 |
|               |                                       | Partial 18S* | ON355275                 |
|               | <i>Androclis granulatus</i>           | COI*         | ON351533                 |
|               |                                       | 16S*         | ON355294                 |
|               |                                       | Partial 18S  | MH925896                 |
|               | <i>Brachysandalus lurco</i>           | COI*         | ON351534                 |
|               |                                       | 16S*         | ON355295                 |
|               |                                       | Partial 18S* | ON355276                 |
|               | <i>Calistocoris caesareus</i>         | COI*         | ON351535                 |
|               |                                       | 16S*         | ON355296                 |
|               |                                       | Partial 18S* | ON355277                 |
|               | <i>Catamiarus brevipennis</i>         | COI*         | ON351536                 |
|               |                                       | 16S*         | ON355297                 |
|               |                                       | Partial 18S  | MH926009                 |
|               | <i>Ectomocoris luridus</i>            | COI*         | OP446104                 |
|               |                                       | 16S*         | OP445248                 |
|               |                                       | Partial 18S* | OP445252                 |
|               | <i>Ectomocoris quadriguttatus</i>     | Partial COI* | OP446105                 |
|               |                                       | 16S*         | OP445249                 |
|               |                                       | Partial 18S* | OP445253                 |
|               | <i>Ectomocoris quadrimaculatus</i>    | COI*         | OP446106                 |
|               |                                       | 16S*         | OP445250                 |
|               |                                       | Partial 18S* | OP445254                 |
|               | <i>Ectomocoris xanthopus</i>          | COI*         | OP446107                 |
|               |                                       | 16S*         | OP445251                 |
|               |                                       | Partial 18S* | OP445255                 |
|               | <i>Eidmannia matogrossensis</i>       | COI*         | ON351539                 |
|               |                                       | 16S*         | ON355300                 |
|               |                                       | Partial 18S  | MH926007                 |
|               | <i>Fusius dilutus</i>                 | COI*         | ON351540                 |
|               |                                       | 16S*         | ON355301                 |
|               |                                       | Partial 18S* | ON355279                 |
|               | <i>Fusius rubricosus</i>              | COI*         | ON351541                 |
|               |                                       | 16S*         | ON355302                 |
|               |                                       | Partial 18S  | MH925984                 |
|               | <i>Sigicoris brumalis</i> comb. nov.  | COI*         | ON351542                 |
|               |                                       | 16S*         | ON355303                 |
|               | <i>Sigicoris dominiqueae</i> sp. nov. | COI*         | ON351543                 |
|               |                                       | 16S*         | ON355304                 |

|                                         |              |           |
|-----------------------------------------|--------------|-----------|
|                                         | Partial 18S* | ON355280  |
| <i>Sigicoris sexguttatus</i> comb. nov. | COI*         | ON351544  |
|                                         | 16S*         | ON355305  |
|                                         | Partial 18S* | ON355281  |
| <i>Lamotteus ornatus</i>                | COI*         | ON351545  |
|                                         | 16S*         | ON355306  |
|                                         | Partial 18S* | ON355282  |
| <i>Lestomerus affinis</i>               | COI*         | ON351546  |
|                                         | 16S*         | ON355307  |
|                                         | Partial 18S  | MH925977  |
| <i>Lestomerus sanctus</i>               | COI*         | ON351547  |
|                                         | 16S*         | ON355308  |
|                                         | Partial 18S* | ON355283  |
| <i>Melanolestes picipes</i>             | COI*         | ON351548  |
|                                         | 16S*         | ON355309  |
| <i>Melanolestes</i> sp.                 | Partial 18S  | KT231841  |
| <i>Microsandalus umbrosus</i>           | COI*         | ON351549  |
|                                         | 16S*         | ON355310  |
|                                         | Partial 18S* | ON355284  |
| <i>Neopirates nyassae</i>               | COI*         | ON351550  |
|                                         | 16S*         | ON355311  |
|                                         | Partial 18S* | ON355285  |
| <i>Oblongiala zimbabwensis</i>          | COI*         | ON351551  |
|                                         | 16S*         | ON355312  |
|                                         | Partial 18S* | ON355286  |
| <i>Pachysandalus collaris</i>           | COI*         | ON351552  |
|                                         | 16S*         | ON355313  |
|                                         | Partial 18S* | ON355287  |
| <i>Parapirates cachani</i>              | COI*         | ON351553  |
|                                         | 16S*         | ON355314  |
|                                         | Partial 18S* | ON355288  |
| <i>Peirates arcuatus</i>                | COI          | NC_024264 |
|                                         | 16S          | NC_024264 |
| <i>Peirates atromaculatus</i>           | COI          | NC_026670 |
|                                         | 16S          | NC_026670 |
| <i>Peirates fulvescens</i>              | COI          | NC_026669 |
|                                         | 16S          | NC_026669 |
| <i>Peirates lepturoides</i>             | COI          | NC_026672 |
|                                         | 16S          | NC_026672 |
| <i>Peirates turpis</i>                  | COI          | NC_026671 |
|                                         | 16S          | NC_026671 |
|                                         | Partial 18S  | KC413804  |
| <i>Phalantus feanus</i>                 | COI*         | ON351554  |
|                                         | 16S*         | ON355315  |
|                                         | Partial 18S* | ON355289  |
| <i>Phalantus geniculatus</i>            | COI          | MF806068  |
|                                         | 16S          | MF806068  |
| <i>Phorastes femoratus</i>              | COI*         | ON351555  |
|                                         | 16S*         | ON355316  |

|                                   |              |           |
|-----------------------------------|--------------|-----------|
| <i>Pteromalestes nyassae</i>      | Partial 18S* | ON355290  |
|                                   | COI*         | ON351556  |
|                                   | 16S*         | ON355317  |
| <i>Rasahus sulcicollis</i>        | Partial 18S  | MH926008  |
|                                   | COI*         | ON351557  |
|                                   | 16S*         | ON355318  |
| <i>Sirthena flavipes</i>          | Partial 18S* | ON355291  |
|                                   | COI          | NC_020143 |
|                                   | 16S          | NC_020143 |
| <i>Thymbreus ocellatus</i>        | Partial 18S  | MH925974  |
|                                   | COI*         | ON351558  |
|                                   | 16S*         | ON355319  |
| <i>Tydides obscurus</i>           | Partial 18S* | ON355292  |
|                                   | COI*         | ON351559  |
|                                   | 16S*         | ON355320  |
| <i>Zeraikia novafriburguensis</i> | COI*         | ON351560  |
|                                   | 16S*         | ON355321  |

---

\*: newly-sequenced in present study.
