# Supplementary material for: Revision of the Assassin Bug Genus Sigicoris stat. nov. Based on Morphological Study and Molecular Phylogeny (Heteroptera: Reduviidae: Peiratinae)
Source: MDPI journal article supplement (doi:10.3390/insects13100951), 2022-10-19
Supplement: s1 [file s1]

**Table S1. Information of newly-sequenced species in the present study.**

| Species                                 | Label information of voucher specimen                                                                                          | Original depository |
|-----------------------------------------|--------------------------------------------------------------------------------------------------------------------------------|---------------------|
| <i>Androclus borneensis</i>             | Malaysia, Sabah, Borneo Jungle Girl Camp, 2017-II-12, Liu Yingqi                                                               | CAU                 |
| <i>Androclus granulatus</i>             | Coll. I.R.Sc.N.B. Enggano Isl., cca 120km W or Bengkulu, v. 2005, 100m, local collectors I.G. 31. 127                          | IRSNB               |
| <i>Brachysandalus lurco</i>             | 25.X.2017 Australia Queensland-Brisbane Sunshine Coast-Cooroy Miloslav Mylek Lgt                                               | CAU                 |
| <i>Calistocoris caesareus</i>           | Malaysia, Sabah, Borneo Jungle Girl Camp, 2016-IV-30, Light, Leg. Li Hu                                                        | CAU                 |
| <i>Catamiarus brevipennis</i>           | 12/09 Dharwar. H. Swale., Catamiarus brevipennis Serv. M.L. Cook det. 1974                                                     | NHM                 |
| <i>Ectomocoris luridus</i>              | SOUTH AFRICA: NATAL UKULU RIVER 2843S 3154E, 11.86 P ATKINSON, AT LIGHT                                                        | NHM                 |
| <i>Ectomocoris quadriguttatus</i>       | Loc. Palayankottai                                                                                                             | CAU                 |
| <i>Ectomocoris quadrimaculatus</i>      | Republic of Uganda Elizabeth 2018-II-25 LI Hu                                                                                  | CAU                 |
| <i>Ectomocoris xanthopus</i>            | N. NIGERIA: Zaria, Samaru. 20-ix-196, J. C. Deeming m. v. trap., Ectomocoris xanthopus Schaum det.,<br>Brit. Mus. 1967-684     | NHM                 |
| <i>Eidmannia guyanensis</i>             | British Guiana Cattle Tail Suivey Takaruni R. (sec. 2) June 1919. a.a. ahaham. Coll, Brit. Mus. 1965-<br>275, NHMUK 013586408  | NHM                 |
| <i>Fusius dilutus</i>                   | NIGERIA: Ibadan, Moor Plantation. 22. iii. 1956. V. F. Eastop. B.M. 1956-283.                                                  | NHM                 |
| <i>Fusius rubricosus</i>                | SOUTH AFRICA: Transvaal n. Kruger National Park Pafuri. 22°27'S 31°17'E 21/1 1979 L. Braack ex.<br>Impala carcass              | NHM                 |
| <i>Sigicoris brumalis</i> comb. nov.    | Stn. No. 46., NEW GUINEA: Madang Dist., Finisterre Mts., Damanti 3,550 ft. 2-11. x. 1964                                       | NHM                 |
| <i>Sigicoris dominiqueae</i> sp. nov.   | Coll. I. R. Sc. N. B. Canopy Mission Papua Neu Guinea (Madang prov): Baiteta 04. VI. 1996 Light trap<br>AR7 Leg. Olivier Missa | IRSNB               |
| <i>Sigicoris sexguttatus</i> comb. nov. | Indonesia, West Papua ARFAK MTS, 1190 m alt DUEBEI ENV, 21. 1-8.2.2008 cca 20 km S of Warmere                                  | CAU                 |

|                                |                                                                                                                                             |      |
|--------------------------------|---------------------------------------------------------------------------------------------------------------------------------------------|------|
|                                | Manokwari distr, St Jakl lgt                                                                                                                |      |
| <i>Lamotteus ornatus</i>       | COLL. MUS. Tervuren Côte d'Ivoire : Bingerville V. 1962 J. Decelle, Lamotteus ornatus Vill. A. Villiers det 1965                            | RMCA |
| <i>Lestomeres affinis</i>      | 2010-VII-22 INDIA Andhra Pradesh Nellore District Naidupet mandal Dwarakapuram village C-C-Chen leg.                                        | CAU  |
| <i>Lestomeres sanctus</i>      | INDIA Andhra Pradesh Nellore District Naidupet mandal Dwarakapuram village c-c chen 2013                                                    | CAU  |
| <i>Melanolestes picipes</i>    | 2012-IV-28 Robinson Lexington KY, USA leg. Hu Li                                                                                            | CAU  |
| <i>Microsandalus umbrosus</i>  | H. Hacker. Bribie Isd Dec 1920, Queensland. H. Hacker. B.M. 1924-455., 94, NHMUK 013588785                                                  | NHM  |
| <i>Neopirates nyassae</i>      | A. Turner Sekoke. July. 1932, NHMUK 013588798                                                                                               | NHM  |
| <i>Oblongiala zimbabwensis</i> | Oblongiala zimbabwensis Det. Yingqi Liu, ZIMBABWE: A. Watsham B.M. 1985-248, Oct. 1984, NHMUK 013588801                                     | NHM  |
| <i>Pachysandalus collaris</i>  | Env. De Fort-Lamy Farcha 6.IV, Rép. du Tchad Bas-Chari, 1964 J. Gruvel, coll.                                                               | MNHN |
| <i>Parapirates cachani</i>     | TAFO GHANA 7:III:66 LESTON, UV TRAP, 862, Parapirates cachani Vill. A Villiers det 1967, Museum Paris                                       | MNHN |
| <i>Phalantus feanus</i>        | Indonesia, Lesser Sunda 700-800 m alt, N. Lombok Isl PUSUK hill, N slopes of MT. RINJANI, S of BENTEK vill 16-22.3.2009, St Jakl lgt        | CAU  |
| <i>Phorastes femoratus</i>     | GUYANA: Demerara, Sorey GDF camp, 50 km SW of Georgetown 27-30 September 1991 J H Martin coll. B M 1991-182                                 | NHM  |
| <i>Pteromalestes nyassae</i>   | S. RHODESIA: Odz. dist 11.2.49 N.C.E. Miller. 201                                                                                           | NHM  |
| <i>Rasahus sulcicollis</i>     | ECUADOR: Pichincha Prov. Tinalandia Hotel, 10 mi. E of Santa Domingo de los Colorados 16/21 Apr. 1984 leg. Brian Harris MV; LACM ENT 195830 | LACM |
| <i>Thymbreus ocellatus</i>     | Teffé. (Ega) Amazonas M. de Mathan 2e Trimestre 1879, Distant Coll. 1911-383., NHM 013585808                                                | NHM  |

|                                   |                                                                                  |      |
|-----------------------------------|----------------------------------------------------------------------------------|------|
| <i>Tydides obscurus</i>           | BRAZIL, Mato Grosso: 12°31'N: 55°37'W Sinop, Oct. 1975, M. Alvarenga             | AMNH |
| <i>Zeraikia novafriburguensis</i> | Rio de Janeiro. Organ Mts. near Tijuca. S. R. Wagner. 1902-287., NHMUK 013586302 | NHM  |

---
